# Supplementary material
Source: Research Square preprint supplement (doi:10.21203/rs.3.rs-9287980/v1)
Supplement: Supplementary file 1 [file 92e896a3524afe8072cd5399.pdf]

1 Real-time Estimation of Seismic Intensity Based on Borehole-To-Surface Intensity Correction

2 Supplementary material

3 Tessei Tanaka, Naofumi Aso

4 **Additional table**

5

Table A1. JMA intensity class

| JMA class | Seismic intensity      | Number of earthquakes |
|-----------|------------------------|-----------------------|
| 0         | $0.495 < I$            | 52335                 |
| 1         | $0.495 \leq I < 1.495$ | 79897                 |
| 2         | $1.495 \leq I < 2.495$ | 31516                 |
| 3         | $2.495 \leq I < 3.495$ | 8836                  |
| 4         | $3.495 \leq I < 4.495$ | 1824                  |
| 5L        | $4.495 \leq I < 4.995$ | 181                   |
| 5U        | $4.995 \leq I < 5.495$ | 89                    |
| 6L        | $5.495 \leq I < 5.995$ | 33                    |
| 6U        | $5.995 \leq I < 6.495$ | 11                    |
| 7         | $6.495 \leq I$         | 2                     |
| Total     |                        | 174724                |

6

Table A2. Comparison between estimated and directly observed intensities

|                                     |    | Estimated seismic intensity |       |       |      |      |     |    |    |    |   |        |
|-------------------------------------|----|-----------------------------|-------|-------|------|------|-----|----|----|----|---|--------|
|                                     |    | 0                           | 1     | 2     | 3    | 4    | 5L  | 5U | 6L | 6U | 7 | Total  |
| Directly observed seismic intensity | 0  | 37062                       | 15059 | 214   | 0    | 0    | 0   | 0  | 0  | 0  | 0 | 52335  |
|                                     | 1  | 7540                        | 67170 | 5172  | 15   | 0    | 0   | 0  | 0  | 0  | 0 | 79897  |
|                                     | 2  | 11                          | 7506  | 23083 | 915  | 1    | 0   | 0  | 0  | 0  | 0 | 31516  |
|                                     | 3  | 0                           | 48    | 2898  | 5732 | 158  | 0   | 0  | 0  | 0  | 0 | 8836   |
|                                     | 4  | 0                           | 0     | 29    | 782  | 1000 | 13  | 0  | 0  | 0  | 0 | 1824   |
|                                     | 5L | 0                           | 0     | 0     | 8    | 98   | 66  | 9  | 0  | 0  | 0 | 181    |
|                                     | 5U | 0                           | 0     | 0     | 0    | 17   | 31  | 33 | 7  | 1  | 0 | 89     |
|                                     | 6L | 0                           | 0     | 0     | 0    | 1    | 8   | 7  | 17 | 0  | 0 | 33     |
|                                     | 6U | 0                           | 0     | 0     | 0    | 0    | 0   | 1  | 6  | 3  | 1 | 11     |
|                                     | 7  | 0                           | 0     | 0     | 0    | 0    | 0   | 0  | 2  | 0  | 0 | 2      |
| Total                               |    | 44613                       | 89783 | 31396 | 7452 | 1275 | 118 | 50 | 32 | 4  | 1 | 174724 |

8

9 **Additional figure**

10

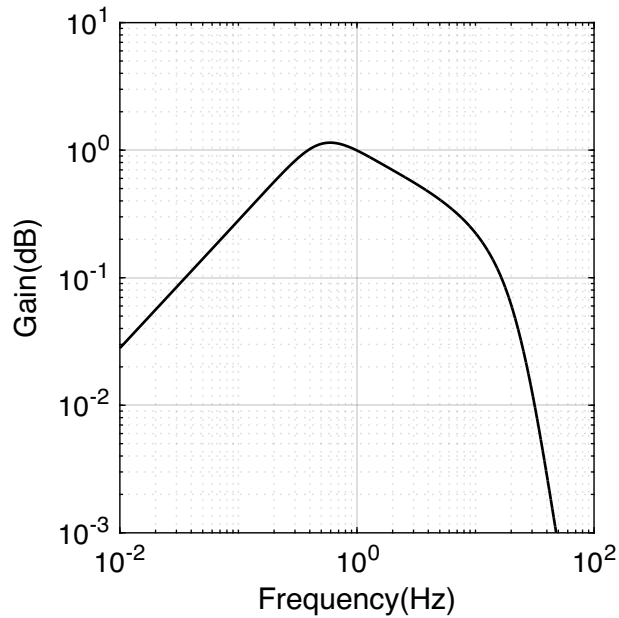

11

Figure A1. Frequency filter for calculating seismic intensity.

12

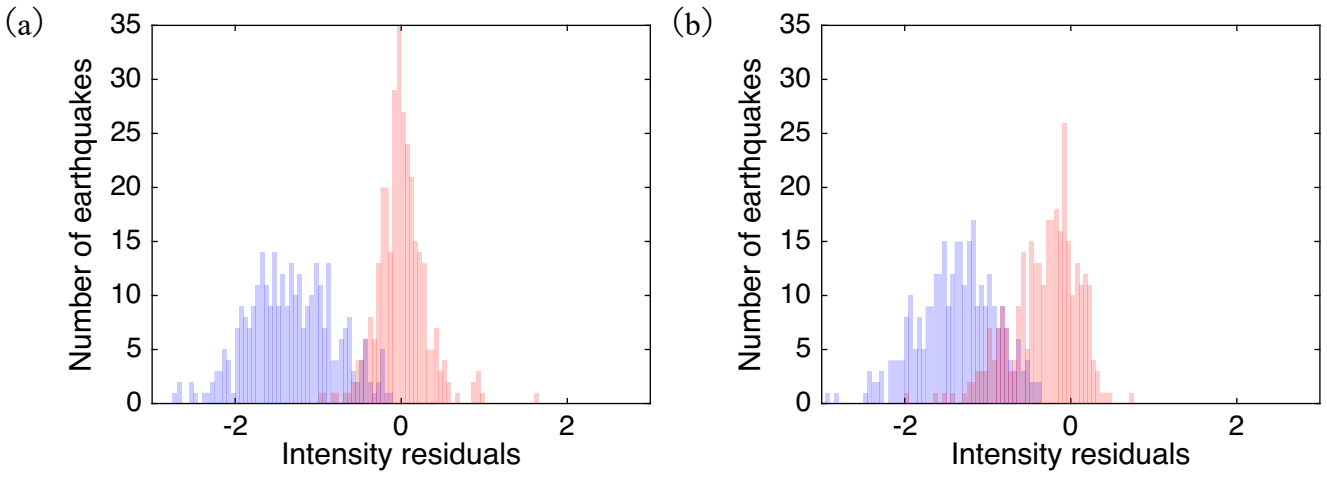

14

Figure A2. Distribution of seismic intensity residual for different level of intensities.

15

16

17

18

19

20

(a) Distribution of seismic intensity residuals for earthquakes with an instrumental intensity of smaller than 4.5. To ensure a consistent comparison, 316 records were randomly sampled to match the number of available records in panel (b). (b) Distribution of seismic intensity residuals for earthquakes with an instrumental intensity greater than 4.5.

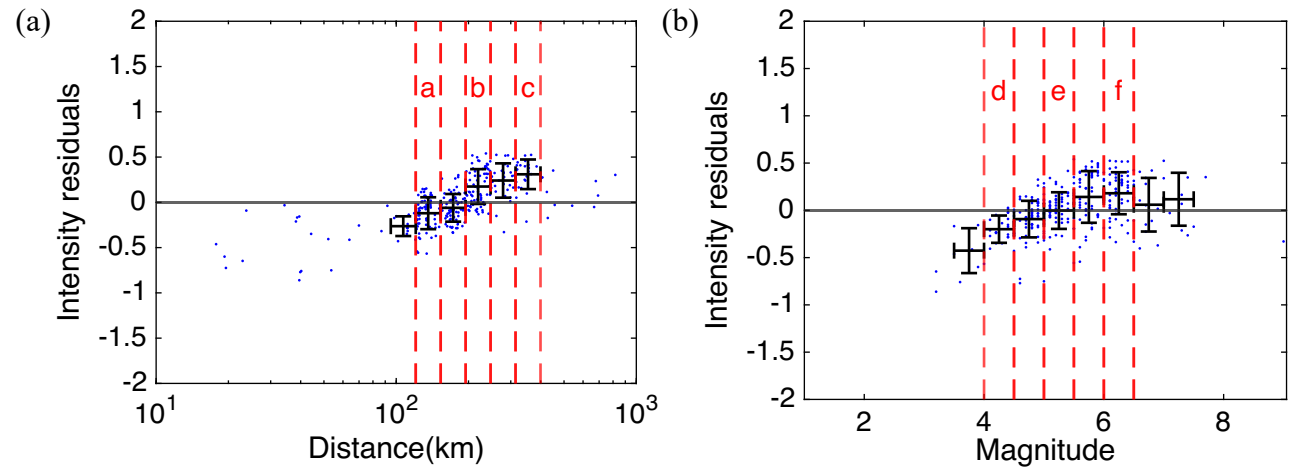

21

22

23

24

Figure A3. Dependency of seismic intensity residuals on surface intensity on (a) distance and (b) magnitude at the station N.ASRH.

Black bars represent the standard deviation for the selected ranges. The ranges defined by red dashed lines correspond to the segments analyzed for the spectral ratios presented in Figure A4.

25

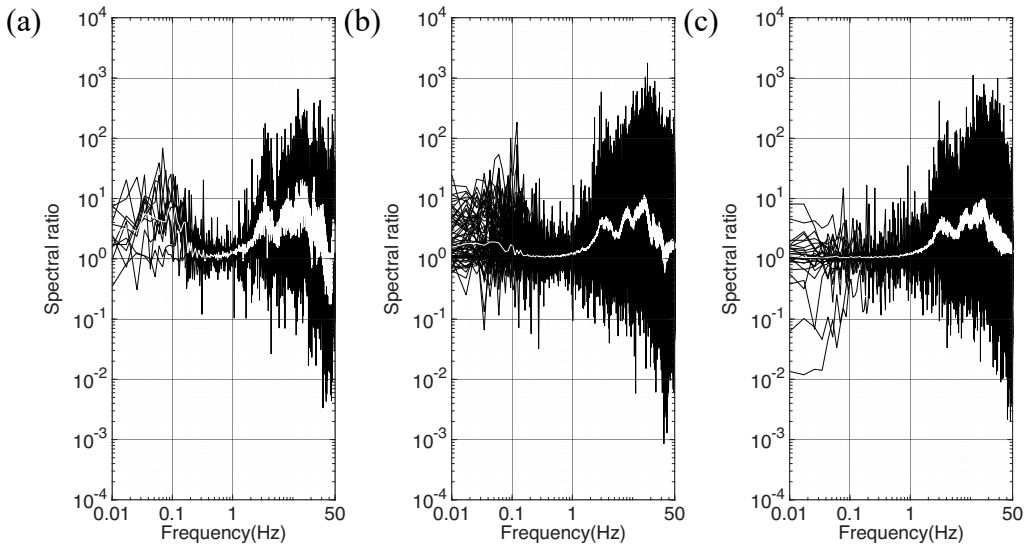

26

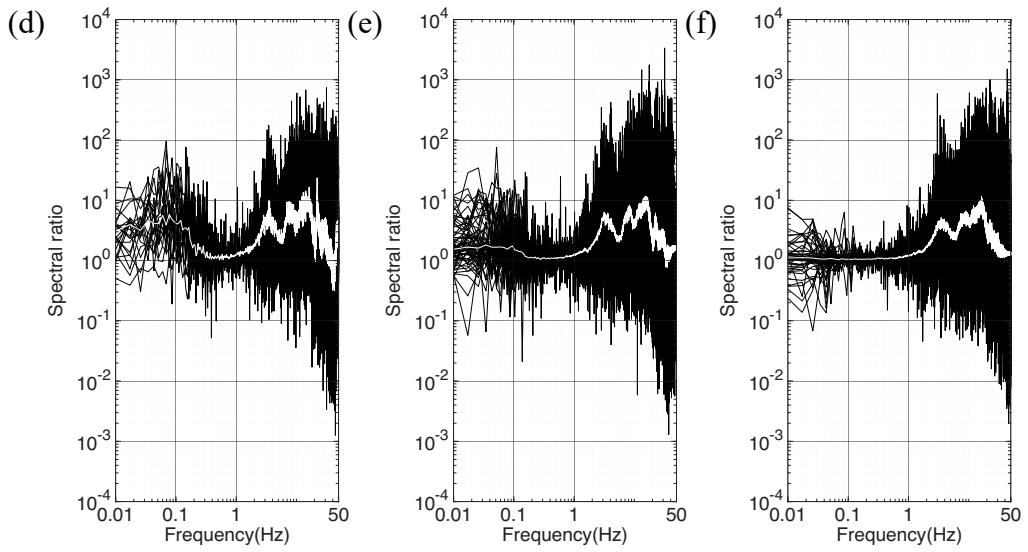

27

Figure A4. Variations in spectral ratios.

28

29

30

31

32

33

Surface-to-borehole spectral ratios. These plots are categorized by the magnitude or distance ranges indicated in Figure A3. The spectral ratio at the low-frequency range is stabilized around unity as the hypocentral distance or magnitude increases.
